# Supplementary material
Source: PubMed Central journal article supplement (PMC3985734)
Supplement: bi401096m_si_001.pdf [file bi401096m_si_001.pdf]

| Peptide Sequence                 | Isoforms | 14T/15WT<br>TEV | 15T/14WT<br>TEV | 14T/15WT<br>UP | 15T/14WT<br>UP | 14T/15W<br>T Mic | 15T/14WT<br>Mic |
|----------------------------------|----------|-----------------|-----------------|----------------|----------------|------------------|-----------------|
| K.AAHLVDSTNQ*VGHFQK.V            | 1,2,3    | 6.74            | --              | --             | --             | --               | --              |
| K.AAHLVDSTNQVGHFQK.V             | 1,2,3    | 10.83 (13)      | 0.059 (6)       | 0.65 (4)       | 1.71 (5)       | --               | 7.73            |
| K.ADGFAGVFPEHK.Y                 | all      | 8.99 (5)        | --              | --             | --             | --               | --              |
| K.ADGFAGVFPEHKYEIVK.R            | (5,6,11) | 1.43            | --              | 0.60 (4)       | 1.7 (6)        | 0.49             | 1.37 (2)        |
| K.ADIGIAVADATDAAR.S              | (5,6,7)  | 8.03 (12)       | 0.06 (4)        | 0.59 (6)       | 2.07 (6)       | --               | 1.38            |
| K.AITTESIDLENVPVEEVFQHLK.C       | 7        | --              | --              | --             | --             | --               | 0.98 (2)        |
| K.AWASLFDNR.T                    | 1        | 12.77 (7)       | --              | 1.48 (2)       | 1.09           | --               | --              |
| K.AWLNLFENK.T                    | 2        | --              | --              | --             | 8.79           | --               | --              |
| K.DANLASIPVEELIEK.A              | 2        | --              | --              | --             | 16.07 (2)      | --               | 4.24            |
| K.DYGIGEREAQWAQQR.T              | 1        | 8.50 (3)        | --              | 2.8 (2)        | --             | --               | --              |
| K.EDVNIFPEK.G                    | 1        | 14.26 (5)       | --              | --             | --             | --               | --              |
| K.EDVNIFPEKGSYR.E                | 1        | 4.1             | --              | 1.09 (2)       | 0.85 (2)       | --               | --              |
| K.EQQNAFYEILHLPNLNEEQR.N         | TAP tag  | --              | --              | 6.01 (3)       | --             | 2.8              | --              |
| K.ESPGAPWEFVGLLPLFDPPR.H         | 2        | --              | --              | --             | 3.14 (4)       | --               | 2.43            |
| K.ESPGAPWEFVGLLPLFDPPRHDSAETIR.R | 2        | --              | --              | --             | 1.84           | --               | --              |
| K.ESPGGPWEFVGLLPLFDPPR.H         | 1        | 5.58 (15)       | --              | 1.25 (7)       | 1.04 (5)       | --               | 0.95            |
| K.ESPGGPWEFVGLLPLFDPPRHDSAETIR.R | 1        | 2.62            | --              | 1.11 (6)       | --             | --               | --              |
| K.ETVDLEN*VPIEEVFESLR.C          | 11       | --              | --              | --             | 0.69           | --               | --              |
| K.ETVDLENVPIEEVFESLR.C           | 11       | 1.5 (5)         | --              | 1.08           | 0.72           | 0.59             | 0.73            |
| K.FNKEQQNAFYEILHLPNLNEEQR.N      | TAP tag  | --              | --              | 2.19           | --             | --               | --              |
| K.GAPEQILDLAN*ARPDLR.K           | 1        | 1.42 (2)        | --              | --             | --             | --               | --              |
| K.GAPEQILDLANARPDLR.K            | 1        | 19.90 (19)      | 0.035 (2)       | 0.76 (11)      | 0.61 (9)       | 1.20 (3)         | 0.825 (2)       |
| K.GAPEQILDLANARPDLRK.K           | 1        | 3.63 (2)        | --              | 1.13 (4)       | 0.75 (2)       | --               | --              |
| K.GAPEQILDLCNAR.A                | 3        | --              | --              | 0.77           | --             | --               | --              |
| K.GAPEQILELAK.A                  | 2        | --              | 3.79 (4)        | --             | 40.17 (3)      | --               | 8.51            |
| K.GAPEQILNLAHNR.A                | 11       | 1.21 (4)        | --              | 1.07           | 0.81           | --               | --              |

| Peptide Sequence                   | Isoforms     | 14T/15WT<br>TEV | 15T/14WT<br>TEV | 14T/15WT<br>UP | 15T/14WT<br>UP | 14T/15W<br>T Mic | 15T/14WT<br>Mic |
|------------------------------------|--------------|-----------------|-----------------|----------------|----------------|------------------|-----------------|
| K.GAPEQILNLAHNRAEIER.R             | 11           | 0.12            | --              | --             | --             | --               | --              |
| K.GLDIDTAGHHYTV.-                  | 1            | 7.87 (7)        | --              | 1.8            | 1.06           | --               | --              |
| K.GSYRELSEIAEQAK.R                 | 1,2          | 2.53 (3)        | 0.54 (2)        | 1.56           | --             | --               | --              |
| K.GVDADTVVLM#AAQASR.L              | 11           | --              | --              | 1.08 (3)       | 0.84 (2)       | 0.94             | --              |
| K.GVEKDQVLLFAAM#ASR.V              | 1,2          | 1.72 (3)        | --              | 0.55 (9)       | 2.23 (7)       | --               | 1.03            |
| K.GVEKDQVLLFAAMASR.V               | 1,2          | 4.66 (14)       | 0.15            | 1.19 (4)       | 1.22 (2)       | --               | --              |
| K.HICGMTGDGVNDAPALKK.A             | (1,2,6,10)   | --              | --              | 1.18           | --             | --               | --              |
| K.HIVGM#TGDGVNDAPALK.K             | 1,2,6,10     | 6.13 (4)        | --              | 0.52 (3)       | 2.35 (2)       | --               | --              |
| K.HIVGM#TGDGVNDAPALKK.A            | 1,2,6,10     | 4.29            | --              | 0.51           | 2.34           | --               | --              |
| K.HIVGMTGDGVN*DAPALKK.A            | 1,2,6,10     | 4.22            | --              | --             | --             | --               | --              |
| K.HIVGMTGDGVNDAPALK.K              | 1,2,6,10     | 4.02 (6)        | --              | 0.58 (2)       | 1.81 (2)       | --               | --              |
| K.HIVGMTGDGVNDAPALKK.A             | 1,2,6,10     | 5.01 (4)        | --              | 0.54 (2)       | 1.76           | --               | --              |
| K.HPGQEVFSGSTCK.Q                  | 1,2          | --              | --              | --             | 1.01 (2)       | --               | --              |
| K.IDQSSLTGESIPVTK.N                | 5            | 2.97 (2)        | --              | 0.49           | --             | --               | --              |
| K.IPIEEVFQQLK.C                    | 1,2,3        | 4.62 (8)        | --              | 0.56 (3)       | 1.27 (3)       | --               | --              |
| K.ISSSGALGGGGSSSSTLEDIKN*ETVDLEK.I | TAP tag      | --              | --              | 0.45           | 1.99           | --               | --              |
| K.ISSSGALGGGGSSSSTLEDIKNETVDLEK.I  | TAP tag      | 4.99 (6)        | --              | 3.55           | --             | --               | --              |
| K.KADIGIADATDAAR.S                 | (5,6,7,9)    | 3.43 (34)       | 0.14            | 0.56 (8)       | 1.62 (8)       | 0.5              | 2.13            |
| K.LGDIIIPADAR.L                    | (4,6,8,9,11) | 9.94 (12)       | 0.08 (2)        | 0.54 (2)       | 2.19 (3)       | --               | --              |
| K.LGDIVPADAR.L                     | 4,6,8,11     | 1.13 (4)        | --              | --             | --             | --               | --              |
| K.LKGLDIDTAGHHYTV.-                | 1            | 5.95 (5)        | --              | 1.04 (2)       | --             | --               | --              |
| K.LSVDKNLVEVFCK.G                  | 1,2          | 5.7 (7)         | 0.06            | 0.60 (4)       | 2.87 (5)       | --               | 1.34            |
| K.LTVDKNLIEVFTK.G                  | 11           | 3.15 (3)        | --              | 1.15 (2)       | 0.97 (2)       | --               | --              |
| K.M#ITGDQLAIGK.E                   | (3,7,8,10)   | 1.60 (4)        | --              | --             | --             | --               | --              |
| K.M#ITGDQLAIGKETGR.R               | (3,7,8,10)   | 2.5             | --              | --             | 1.62           | --               | --              |
| K.MITGDQLAIGK.E                    | (3,7,8,10)   | 9.24 (7)        | --              | --             | 1.68           | --               | 1.33            |

| Peptide Sequence                          | Isoforms     | 14T/15WT<br>TEV | 15T/14WT<br>TEV | 14T/15WT<br>UP | 15T/14WT<br>UP | 14T/15W<br>T Mic | 15T/14WT<br>Mic |
|-------------------------------------------|--------------|-----------------|-----------------|----------------|----------------|------------------|-----------------|
| K.MITGDQLAIGKETGR.R                       | (3,7,8,10)   | 3.83 (4)        | --              | --             | --             | --               | --              |
| K.NETVDLEKIPIEEVFQQLK.C                   | 1,2          | 1.17 (4)        | --              | --             | --             | --               | --              |
| K.NLVEVFCK.G                              | 1,2,3        | 3.54 (5)        | --              | --             | --             | --               | --              |
| K.Q*GEIEAVVIATGVHTFFGK.A                  | (5,9,10,11)  | --              | --              | 0.22           | 1.15 (2)       | --               | --              |
| K.QGEIEAVVIATGVHTFFGK.A                   | (5,9,10,11)  | 2.20 (11)       | 0.39 (4)        | 0.28 (15)      | 1.90 (36)      | --               | 1.72            |
| K.SNFIAVSAANR.F                           | TAP tag      | 11.25 (7)       | --              | 5.87           | --             | --               | --              |
| K.TAALAQ*HDDVGSTSM#ESSR.W                 | TAP tag      | 2.74            | --              | --             | --             | --               | --              |
| K.TAALAQHDDVGSTSM#ESSR.W                  | TAP tag      | 59.66 (7)       | --              | 27.33 (3)      | --             | --               | --              |
| K.TAALAQHDDVGSTSMESSR.W                   | TAP tag      | 114.19 (17)     | --              | 12.32 (2)      | --             | --               | --              |
| K.TDFFSDTFGVR.S                           | 2            | --              | --              | --             | 25.83          | --               | --              |
| K.TKESPGAPWEFVGLLPLFDPPR.H                | 2            | --              | --              | --             | 2.88           | --               | --              |
| K.TKESPGPWEFVGLLPLFDPPR.H                 | 1            | 3.45 (3)        | --              | 1.19           | 0.93           | --               | --              |
| K.VDQSALTGESLPVTK.H                       | 1,2          | 6.75 (8)        | 0.05 (3)        | 0.48 (2)       | 1.45 (2)       | 0.53             | 1.95            |
| K.VLSCIDKYAER.G                           | 1            | 10.52 (14)      | --              | 1.09 (2)       | 0.86 (2)       | --               | --              |
| K.VLSIIDKYAER.G                           | 2            | --              | --              | --             | 21.38 (6)      | --               | --              |
| K.WSEQEAAILVPGDIVSIK.L                    | 1,2          | 11.44 (10)      | 0.04 (3)        | 0.49 (5)       | 1.81 (7)       | 0.45             | 2               |
| K.WSEQEAAILVPGDIVSIKLGDIIPADAR.L          | 1,2          | 3.44 (2)        | --              | --             | --             | --               | --              |
| K.WSEQEASILVPGDIVSIK.L                    | 3, At4g11730 | --              | --              | 0.46           | --             | --               | --              |
| K.YRDGIDN*LLVLLIGGIPIAM#PTVLSVTM#AIGSHR.L | 1,2,6,8,9    | --              | --              | --             | 2.2            | --               | --              |
| K.YRDGIDNLLVLLIGGIPIAM#PTVLSVTM#AIGSHR.L  | 1,2,6,8,9    | --              | --              | 0.47 (6)       | 1.83 (8)       | --               | --              |
| K.YRDGIDNLLVLLIGGIPIAMPTVLSVTM#AIGSHR.L   | 1,2,6,8,9    | --              | --              | --             | 1.04           | --               | --              |
| R.ALNLGVNVK.M                             | 1,2,5,11     | 15.63 (10)      | --              | 0.62 (2)       | 1.77 (2)       | --               | 2.12            |
| R.AN*CLDLIQEPAGK.S                        | 4,11         | --              | --              | --             | --             | 2.49             | --              |
| R.AWDLVIEQR.V                             | 4,11         | 1.47 (2)        | --              | --             | --             | --               | --              |
| R.AYRPGIDNLLVLLIGGIPIAM#PTVLSVTM#AIGSHR.L | 4,11         | --              | --              | 0.79           | --             | --               | --              |
| R.DGIDNLLVLLIGGIPIAM#PTVLSVTM#AIGSHR.L    | 1,2,6,8,9    | --              | --              | 0.55 (4)       | 1.87 (2)       | --               | --              |

| Peptide Sequence                          | Isoforms     | 14T/15WT<br>TEV | 15T/14WT<br>TEV | 14T/15WT<br>UP | 15T/14WT<br>UP | 14T/15W<br>T Mic | 15T/14WT<br>Mic |
|-------------------------------------------|--------------|-----------------|-----------------|----------------|----------------|------------------|-----------------|
| R.DGIDNLLVLLIGGIPIAM#PTVLSVTMAIGSHR.L     | 1,2,6,8,9    | --              | --              | 0.5            | --             | --               | --              |
| R.DGIDNLLVLLIGGIPIAMPTVLSVTM#AIGSHR.L     | 1,2,6,8,9    | --              | --              | 0.66           | 1.03           | 0.38             | --              |
| R.DGKWSEQEAAILVPGDIVSIK.L                 | 1,2          | 4.52 (5)        | --              | 0.48 (6)       | 2.17 (7)       | --               | --              |
| R.DGKWSEQEASILVPGDIVSIK.L                 | 3, At4g11730 | --              | --              | 0.50 (4)       | 1.08 (4)       | --               | --              |
| R.EAQWAQAQR.T                             | 1,9          | --              | --              | --             | 1.11           | --               | --              |
| R.EGLTTQEGEDR.I                           | 1,2          | --              | --              | 0.92 (3)       | 1.66 (3)       | --               | --              |
| R.EGLTTQEGEDRIQIFGPNK.L                   | 2            | --              | --              | --             | 3.75 (2)       | --               | --              |
| R.EGLTTQEGEDRIVIFGPNK.L                   | 1            | --              | --              | 0.77           | --             | --               | --              |
| R.ELSEIAEQAK.R                            | 1,2          | 4.87 (2)        | --              | --             | 2.25           | --               | --              |
| R.ELSEIAEQAKR.R                           | 1,2          | 4.06 (5)        | --              | --             | 0.55 (3)       | --               | --              |
| R.EVHFLPFNPDKR.T                          | 4,11         | 2.58 (2)        | --              | 1.04 (3)       | 0.69 (2)       | --               | --              |
| R.EVHFLPFNPVDK.R                          | 4,11         | 4.88 (2)        | --              | --             | --             | --               | --              |
| R.EVHFLPFNPVDK.R.T                        | 4,11         | 12.13 (11)      | 0.045 (2)       | 0.53 (9)       | 2.10 (9)       | --               | --              |
| R.GASDIVLTEPGLSVIISAVLTSR.A               | 1,2,3,5,7    | 1.81 (33)       | --              | 0.57 (81)      | 1.01 (151)     | --               | 0.85 (3)        |
| R.GGYRELSEIANQAK.R                        | 3            | --              | --              | 0.84 (2)       | --             | --               | --              |
| R.IENQDAIDAAIVGMLADPK.E                   | 5            | 1.04 (4)        | --              | 0.79 (2)       | 0.73 (2)       | --               | --              |
| R.IQIFGPNKLEEK.K                          | 2            | --              | --              | 0.77           | 6.52 (2)       | --               | --              |
| R.IVIFGPNKLEEK.K                          | 1            | 17.39 (6)       | --              | 1.41 (2)       | 1.02           | --               | --              |
| R.KHICGM#TGDGVNDAPALK.K                   | (1,2,5,6,10) | --              | --              | --             | 1.19           | --               | --              |
| R.KHICGMTGDGVNDAPALK.K                    | (1,2,5,6,10) | 1.25            | --              | 1.16 (2)       | 1.11           | --               | --              |
| R.KHIVGM#TGDGVNDAPALK.K                   | 1,2,6        | 6.14 (4)        | --              | 0.49 (3)       | 1.91 (4)       | --               | --              |
| R.KHIVGMTGDGVNDAPALK.K                    | 1,2,6        | 6.01 (11)       | --              | 0.65 (5)       | 1.87 (4)       | --               | --              |
| R.LENQDAIDTAIVSMLSDPK.E                   | 7            | --              | --              | --             | 1.03           | --               | --              |
| R.LGM#GTN*M#YPSAALLGTDKDSN*IASIPVEELIEK.A | 1            | --              | --              | --             | 0.43           | --               | --              |
| R.LGM#GTN*M#YPSSALLGQVK.D                 | 5            | --              | --              | --             | 12.82          | --               | --              |
| R.LGM#GTN*MYPSAALLGTDKDSNIASIPVEELIEK.A   | 1            | --              | --              | --             | 0.76           | --               | --              |
| R.LGM#GTNM#YPSAALLGTDKDSN*IASIPVEELIEK.A  | 1            | --              | --              | 1.2            | 0.67           | --               | --              |

| Peptide Sequence                        | Isoforms    | 14T/15WT<br>TEV | 15T/14WT<br>TEV | 14T/15WT<br>UP | 15T/14WT<br>UP | 14T/15W<br>T Mic | 15T/14WT<br>Mic |
|-----------------------------------------|-------------|-----------------|-----------------|----------------|----------------|------------------|-----------------|
| R.LGM#GTNM#YPSAALLGTDKDSNIASIPVEELIEK.A | 1           | --              | --              | 1.28 (4)       | 0.73 (4)       | 1.27 (2)         | 0.76            |
| R.LGM#GTNMYPSAALLGTDKDSNIASIPVEELIEK.A  | 1           | 1.89 (2)        | --              | 1.14 (3)       | 0.84           | --               | 0.91            |
| R.LGM#GTNMYPSSALLGQ*DK.D                | 9           | --              | --              | --             | --             | 1.48             | --              |
| R.LGMGSNMYPSSLLGK.H                     | 3           | --              | --              | 0.63           | 0.94           | --               | --              |
| R.LGMGTN*M#YPSSALLGTHKDANLASIPVEELIEK.A | 1           | 14.12           | --              | --             | --             | --               | --              |
| R.LGMGTN*MYPSAALLGTDKDSNIASIPVEELIEK.A  | 1           | 5.82 (2)        | --              | --             | --             | --               | --              |
| R.LGMGTNM#YPSAALLGTDKDSN*IASIPVEELIEK.A | 1           | --              | --              | --             | 0.73           | --               | --              |
| R.LGMGTNM#YPSAALLGTDKDSNIASIPVEELIEK.A  | 1           | --              | --              | 1.14           | 0.84           | 0.93             | --              |
| R.LGMGTNMYPSAALLGTDKDSN*IASIPVEELIEK.A  | 1           | 11.32 (3)       | --              | 0.95 (2)       | --             | 0.95             | --              |
| R.LGMGTNMYPSAALLGTDKDSNIASIPVEELIEK.A   | 1           | 15.43 (7)       | 0.04            | 0.95(4)        | 0.86 (8)       | 1.06             | 0.94 (2)        |
| R.LGMGTNMYPSSALLGQ*HKDESIGALPIDDLIEK.A  | 11          | --              | --              | 0.77           | --             | --               | --              |
| R.LGMGTNMYPSSALLGTHK.D                  | 2           | --              | --              | --             | 1.58 (2)       | --               | --              |
| R.LLDGDPLKIDQ*SALTGESLPVTK.H            | 9           | --              | --              | --             | 1.41           | --               | --              |
| R.LLDGDPLKIDQSALTGESLPVTK.H             | 9           | 14.74 (9)       | 0.04 (2)        | 0.51 (1)       | 1.63 (4)       | 0.44             | --              |
| R.LLEGDPLK.I                            | (1,2,3,5,9) | 2.67            | --              | --             | --             | --               | --              |
| R.LLEGDPLKIDQ*SVLTGESLPVTK.K            | 10          | 3.64            | --              | --             | --             | --               | --              |
| R.LLEGDPLKIDQSALTGESLPVTK.S             | 4           | --              | --              | 0.26           | 1.04 (4)       | --               | --              |
| R.LLEGDPLKIDQSSLTGESLPVTK.G             | 11          | --              | --              | 1.13 (3)       | 0.84 (5)       | 0.71 (2)         | 0.71 (2)        |
| R.LLEGDPLKVDQ*SALTGESLPATK.G            | 3           | --              | --              | --             | 0.71           | --               | --              |
| R.LLEGDPLKVDQSALTGESLPATK.G             | 3           | --              | --              | 0.83 (4)       | 0.86 (3)       | --               | --              |
| R.LLEGDPLKVDQSALTGESLPVTK.H             | 1,2         | 12.60 (10)      | 0.05 (2)        | 0.51 (8)       | 1.83 (7)       | 0.44             | 2.19 (2)        |
| R.LSQGAIK.R                             | (3,5,7)     | --              | --              | --             | 1.35 (3)       | --               | --              |
| R.M#TAIEEM#AGM#DVLCSDK.T                | (5,10)      | --              | --              | 0.62           | 1.76 (3)       | --               | --              |
| R.M#TAIEEM#AGM#DVLCSDKTGTTLN*K.L        | (5,10)      | --              | --              | 0.39           | --             | --               | --              |
| R.M#TAIEEM#AGM#DVLCSDKTGTTLNK.L         | (5,10)      | --              | --              | 0.46 (2)       | 1.57 (6)       | --               | --              |
| R.M#TAIEEM#AGMDVLCSDKTGTTLNK.L          | (5,10)      | --              | --              | --             | 1.65           | --               | --              |

| Peptide Sequence                             | Isoforms | 14T/15WT<br>TEV | 15T/14WT<br>TEV | 14T/15WT<br>UP | 15T/14WT<br>UP | 14T/15W<br>T Mic | 15T/14WT<br>Mic |
|----------------------------------------------|----------|-----------------|-----------------|----------------|----------------|------------------|-----------------|
| R.M#TAIEEMAGM#DVLCSDKTGTLTLNK.L              | (5,10)   | --              | --              | --             | 1.33 (2)       | --               | --              |
| R.M#TAIEEMAGMDVLCSDKTGTLTLNK.L               | (5,10)   | --              | --              | 0.53 (3)       | 1.15 (3)       | --               | --              |
| R.MTAIEEM#AGM#DVLCSDKTGTLTLN*K.L             | (5,10)   | 3.45            | --              | --             | --             | --               | --              |
| R.MTAIEEM#AGM#DVLCSDKTGTLTLNK.L              | (5,10)   | 4.82            | --              | --             | 1.32 (2)       | --               | --              |
| R.MTAIEEM#AGMDVLCSDKTGTLTLNK.L               | (5,10)   | --              | --              | 0.63           | --             | --               | --              |
| R.MTAIEEMAGMDVLCSDK.T                        | (5,10)   | 3.87 (7)        | --              | --             | --             | --               | --              |
| R.MTAIEEMAGMDVLCSDKTGTLTLN*K.L               | (5,10)   | --              | --              | 0.51           | --             | --               | --              |
| R.MTAIEEMAGMDVLCSDKTGTLTLNK.L                | (5,10)   | 35.06 (8)       | 0.54            | 0.59           | 1.50 (6)       | --               | --              |
| R.NAFIQ*SLKDDPSQSANLLAEAK.K                  | TAP tag  | --              | --              | --             | --             | 0.88             | --              |
| R.NAFIQSLKDDPSQ*SANLLAEAK.K                  | TAP tag  | --              | --              | 3.39           | --             | --               | --              |
| R.NAFIQSLKDDPSQSANLLAEAK.K                   | TAP tag  | --              | --              | 12.49 (4)      | --             | 2.45             | --              |
| R.RALNLGVNVK.M                               | 1,2,5,11 | 6.99 (5)        | --              | 0.58 (2)       | 1.64 (2)       | --               | --              |
| R.SLAVAYQEVPEGTK.E                           | 11       | 2.59 (5)        | --              | 0.93 (2)       | --             | --               | --              |
| R.SWSFVERPGALLM#IAFLIAQ*LIATLIAVYANWEFAK.I   | 2        | --              | --              | --             | 4.69           | --               | --              |
| R.SWSFVERPGALLM#IAFLIAQLIATLIAVYAN*WEFAK.I   | 2        | --              | --              | 0.25           | --             | --               | --              |
| R.SWSFVERPGALLM#IAFLIAQLIATLIAVYAN*WEFAKIR.G | 2        | --              | --              | --             | 0.69           | --               | --              |
| R.SWSFVERPGALLM#IAFLIAQLIATLIAVYANWEFAK.I    | 2        | --              | --              | --             | 2.13 (4)       | --               | --              |
| R.SWSFVERPGALLM#IAFVIAQLVATLIAVYADWTFK.V     | 2        | --              | --              | 1.05 (2)       | 0.75 (4)       | --               | --              |
| R.SWSFVERPGALLMIAFVIAQLVATLIAVYADWTFK.V      | 2        | --              | --              | 0.88 (2)       | --             | --               | --              |
| R.TALTYIDGSGNWHR.V                           | 2        | --              | 11.89           | --             | 71.33 (6)      | --               | --              |
| R.TALTYIDSDGKMHR.V                           | 11       | 3.62 (2)        | --              | --             | --             | --               | --              |
| R.TALTYIDSDGNWHR.V                           | 1        | 27.99 (25)      | 0.03 (4)        | 1.16 (11)      | 0.85 (9)       | 1.28 (2)         | 1.12 (2)        |
| R.TFGVSTLEK.T                                | 11       | 1.41            | --              | --             | --             | --               | --              |
| R.THFNELSQM#AEEAK.R                          | 11       | --              | --              | --             | 1.07 (2)       | --               | --              |
| R.THFNELSQM#AEEAKR.R                         | 11       | --              | --              | 1.28 (3)       | 1.00 (2)       | --               | --              |
| R.THFNELSQMAEEAK.R                           | 11       | 3.08 (2)        | --              | 1.37           | --             | --               | --              |

| Peptide Sequence           | Isoforms | 14T/15WT<br>TEV | 15T/14WT<br>TEV | 14T/15WT<br>UP | 15T/14WT<br>UP | 14T/15W<br>T Mic | 15T/14WT<br>Mic |
|----------------------------|----------|-----------------|-----------------|----------------|----------------|------------------|-----------------|
| R.THFNELSQMAEEAKR.R        | 11       | 2.49 (2)        | --              | 1.4            | 0.98           | --               | --              |
| R.TLHGLQNTETANVPPER.G      | 3        | --              | --              | 1.17           | --             | --               | --              |
| R.TLHGLQPKEDVNIFPEK.G      | 1        | 6.59 (4)        | --              | 1.08 (3)       | 0.66 (2)       | --               | --              |
| R.VEN*QDAIDAAM#VGM#LADPK.E | 1,2,3    | --              | 0.21            | --             | --             | --               | --              |
| R.VENQ*DAIDAAM#VGM#LADPK.E | 1,2,3    | --              | --              | --             | --             | 0.51             | --              |
| R.VENQDAIDAAM#VGM#LADPK.E  | 1,2,3    | 3.83 (4)        | --              | 0.53 (7)       | 2.09 (11)      | 0.69             | 2.41 (4)        |
| R.VENQDAIDAAM#VGMLADPK.E   | 1,2,3    | 2.19 (2)        | --              | 0.63 (2)       | 2.01 (4)       | 1.45             | 1.63            |
| R.VENQDAIDAAMVGM#LADPK.E   | 1,2,3    | --              | --              | 0.65           | 1.32 (5)       | --               | --              |
| R.VENQDAIDAAMVGMLADPK.E    | 1,2,3    | 9.01 (12)       | 0.11 (4)        | 0.58 (7)       | 1.54 (12)      | 0.62 (3)         | 1.39 (3)        |
| R.VENQDAIDAAMVGMLADPKEAR.A | 1,2,3    | 5.22            | --              | --             | --             | --               | --              |
| R.VHAVIDKFAER.G            | 4,11     | 1.69            | --              | --             | --             | --               | --              |
| R.VKPSPTPDSWK.L            | 1,2,3    | 2.06            | --              | --             | --             | --               | --              |
| R.WGEQDAAAILVPGDIISIK.L    | 4,11     | 1.27 (3)        | --              | 1.15 (3)       | 0.87 (3)       | 0.45             | 0.47            |
