# Supplementary material
Source: PubMed Central journal article supplement (PMC3985734)
Supplement: bi401096m_si_002.pdf [file bi401096m_si_002.pdf]

MSTVVDNKFN KEQQNAFYEI LHLPLNNEEQ RNAFIQSLKD DPSQSANLLA EAKKLNDQA PKMHVDNKFN KEQQNAFYEI 80  
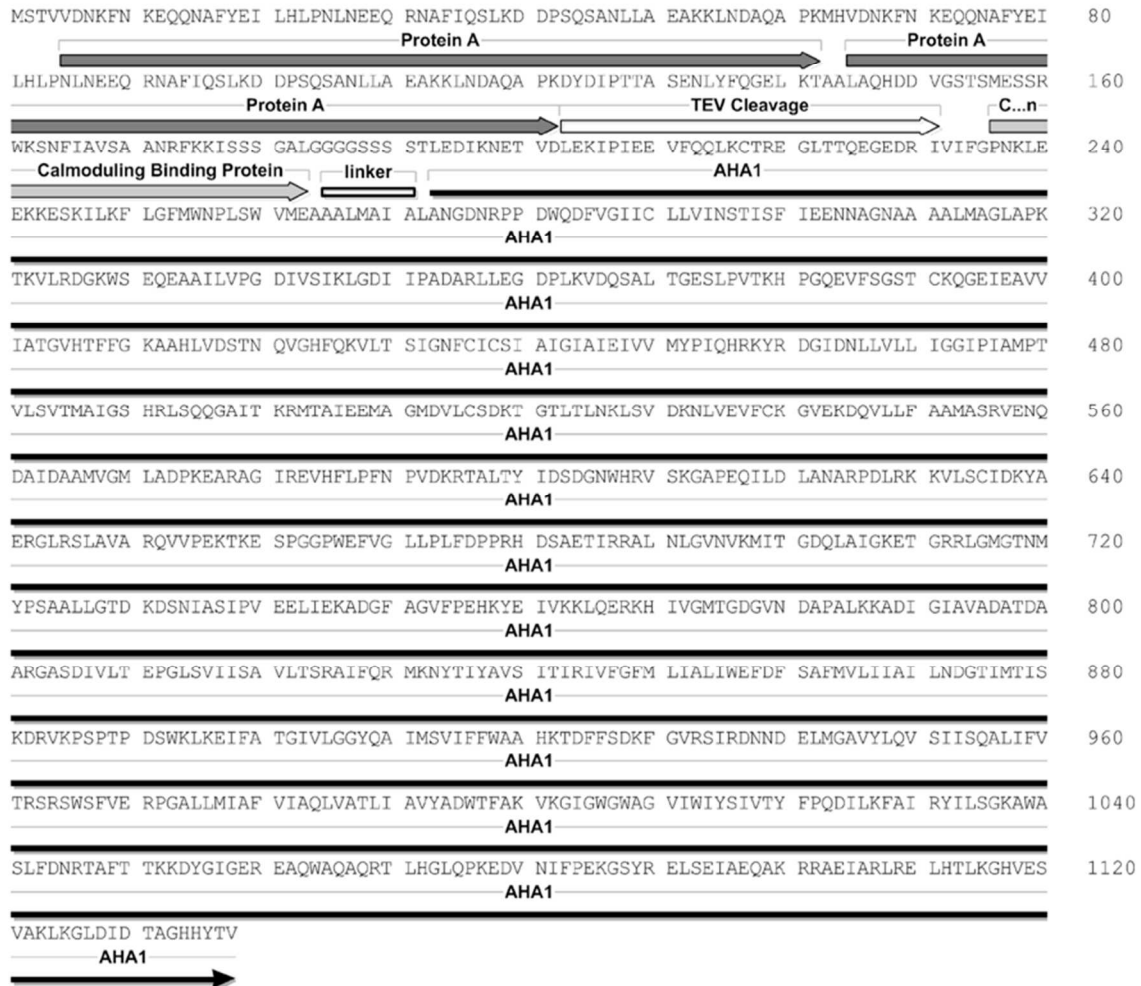

LHLPLNNEEQ RNAFIQSLKD DPSQSANLLA EAKKLNDQA PKDYDIPTTA SENLYFQGEL KTAALAQHDD VGSTSMESSR 160  
 WKSNFIAVSA ANRFKKISSS GALGGGGSSS STLEDIKNET VDLEKIPIEE VFQQLKCTRE GLTTQEGEDR IVIFGPNKLE 240  
 EKKEKILKF LGFMWNPLSW VMEAAALMAI ALANGDNRPP DWQDFVGIIC LLVINSTISF IEENNAGNAA AALMAGLAPK 320  
 TKVLRDGKWS EQEAAILVPG DIVSIKLGDI IPADARLLEG DPLKVDQSAL TGESLPVTKH PGQEVFSGST CKQGEIEAVV 400  
 IATGVHTFFG KAAHLVDSTN QVGHFQKVLV SIGNFCICSI AIGIAIEIVV MYPIQHRKYR DGIDNLLVLL IGGIPIAMPT 480  
 VLSVTMAIGS HRLSQQGAIT KRMTAIEEMA GMDVLCSDKT GTLTLNKLVS DKNLVEVFCK GVEKDQVLLF AAMASRVENQ 560  
 DAIDAAMVGM LADPKEARAG IREVFHLPFN PVDKRTALTY IDSDGNWHRV SKGAPEQILD LANARPDLRK KVLSCIDKYA 640  
 ERGLRSLAVA RQVPEKTKE SPGGPWEFVG LLPLFDPPRH DSAETIRRAL NLGVNVKMIT GDQLAIGKET GRRIGMGTNM 720  
 YPSAALLGTD KDSNIASIPV EELIEKADGF AGVPPEHKYE IVKKLQERKH IVGMTGDGVN DAPALKKADI GIAVADATDA 800  
 ARGASDIVLT EPGLSVIISA VLTSRAIFQR MKNYTIYAVS ITIRIVFGFM LIALIWEFDF SAFMVLIIAI LNDGTIMTIS 880  
 KDRVKPSPTP DSWKLKEIFA TGIVLGGYQA IMSVIFWAA HKTDFFSDF GVSIRDND ELMGAVYLQV SIISQALIFV 960  
 TRSRWSFVE RPGALLMIAF VIAQLVATLI AVYADWTFK VKGIGWGAG VIWIYSIVTY FPQDILKFAI RYILSGKAWA 1040  
 SLFDNRFTAFT TKKDYGIGER EAQWAQART LHGLQPKEDV NIFPEKGSYR ELSEIAEQAK RRAEIARLRE LHTLKGHVES 1120  
 VAKLKGLDID TAGHHYTV  
 AHA1

**Supplemental Figure S1:** Full amino acid sequence of the predicted expressed Ntapi:AHA1 protein.

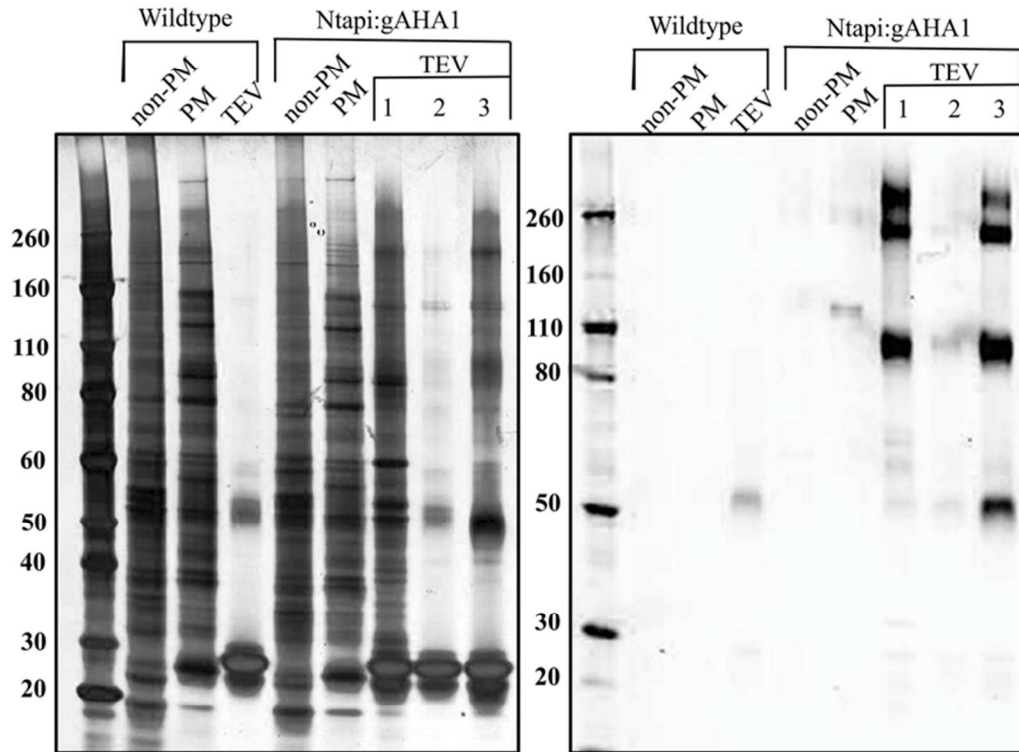

**Supplemental Figure S2.** Comparison of IgG resin washing conditions by Western blot.

100 $\mu$ g solubilized wildtype plasma membrane proteins were incubated with IgG purification resin, washed three times with 0.1% SDS and 150mM NaCl in resuspension buffer (330mM sorbitol, 5mM KCl, 5mM K<sub>2</sub>HPO<sub>4</sub> pH 7.8) followed by three times with 1X AcTEV buffer, and eluted overnight with AcTEV protease. Likewise, 100 $\mu$ g of solubilized Ntapi:gAHA1 plasma membrane proteins bound to and eluted from IgG resin; however, three washing conditions were tested as indicated: 1) two washes with 0.1% NP40, one wash with 0.1% NP40 and 0.01% SDS, and three washes with 1X AcTEV buffer, 2) three washes with 0.1% SDS and 150mM NaCl followed by three washes with 1X AcTEV buffer, and 3) three washes with 0.1% SDS followed by three washes with 1X AcTEV buffer. Proteins were eluted overnight with AcTEV protease, and eluted proteins were acetone precipitated and resuspended directly in Laemmli sample buffer

with reducing agent. 400ng of non-plasma membrane (non-PM) and plasma membrane (PM) wildtype or Ntapi:gAHA1 protein and half of TEV eluted proteins were loaded on 4-12% NuPAGE gels. Left panel is silver stained for total protein and right panel is a Western blot probed with rabbit anti-CBP followed by LICOR IRDye goat anti-rabbit. Markers indicated in kDa.

**Supplemental Table S1:** Total peptide identifications in soluble and plasma membrane fractions of metabolically labeled genotype pairs.

| <b>Genotype Pairs<br/>(<sup>14</sup>N/<sup>15</sup>N)</b> | <b>Soluble -1<sup>a</sup></b> | <b>Soluble - 2<sup>b</sup></b> | <b>PM<sup>c</sup> - 1</b> | <b>PM - 2</b> |
|-----------------------------------------------------------|-------------------------------|--------------------------------|---------------------------|---------------|
| WT/WT - 1                                                 | 1664                          | 1751                           | 1965                      | 2180          |
| WT/WT - 2                                                 | 1490                          | 1769                           | 1803                      | 1908          |
| gAHA/WT                                                   | 1311                          | 1625                           | 2181                      | 1586          |
| WT/gAHA                                                   | 1337                          | 1530                           | 1860                      | 1691          |
| TAPa <sup>d</sup> /WT                                     | 1082                          | 1399                           | 1630                      | 1361          |
| WT/TAPa                                                   | 1028                          | 1197                           | 2032                      | 1505          |
| TAPb <sup>e</sup> /WT                                     | 2490                          | --                             | 2350                      | --            |
| WT/TAPb                                                   | 2395                          | --                             | 2629                      | --            |

<sup>a</sup>First biological replicate <sup>b</sup>Second biological replicate <sup>c</sup>Plasma membrane <sup>d</sup>Ntapi:gAHA1a  
<sup>e</sup>Ntapi:gAHA1b

**Supplemental Table S2:** Total protein identifications in soluble and plasma membrane fractions of metabolically labeled genotype pairs.

| <b>Genotype Pairs<br/>(<sup>14</sup>N/<sup>15</sup>N)</b> | <b>Soluble -1<sup>a</sup></b> | <b>Soluble - 2<sup>b</sup></b> | <b>PM<sup>c</sup> - 1</b> | <b>PM - 2</b> |
|-----------------------------------------------------------|-------------------------------|--------------------------------|---------------------------|---------------|
| WT/WT - 1                                                 | 702                           | 683                            | 784                       | 835           |
| WT/WT - 2                                                 | 635                           | 700                            | 738                       | 702           |
| gAHA/WT                                                   | 547                           | 649                            | 823                       | 624           |
| WT/gAHA                                                   | 553                           | 627                            | 754                       | 679           |
| TAP <sup>d</sup> /WT                                      | 443                           | 593                            | 688                       | 581           |
| WT/TAP                                                    | 451                           | 540                            | 818                       | 601           |
| TAPb <sup>e</sup> /WT                                     | 809                           | --                             | 722                       | --            |
| WT/TAPb                                                   | 785                           | --                             | 819                       | --            |

<sup>a</sup>First biological replicate <sup>b</sup>Second biological replicate <sup>c</sup>Plasma membrane <sup>d</sup>Ntapi:gAHA1a  
<sup>e</sup>Ntapi:gAHA1b

**Supplemental Table S3:** Percent of proteins identified in soluble and plasma membrane metabolically labeled genotype pairs by increasing numbers of peptides.

|                          | <b>Genotype Pairs</b><br>( <sup>14</sup> N/ <sup>15</sup> N) | <b>1<sup>a</sup></b> | <b>2</b> | <b>3</b> | <b>4</b> | <b>5</b> | <b>6-10</b> | <b>11-15</b> | <b>16-20</b> | <b>&gt;20</b> |
|--------------------------|--------------------------------------------------------------|----------------------|----------|----------|----------|----------|-------------|--------------|--------------|---------------|
| Soluble – 1 <sup>b</sup> | WT/WT – 1                                                    | 51.1 <sup>c</sup>    | 19.5     | 12.0     | 5.7      | 3.4      | 7.0         | 0.9          | 0.3          | 0.1           |
|                          | WT/WT – 2                                                    | 50.9                 | 21.7     | 10.9     | 4.7      | 4.1      | 6.0         | 1.4          | 0.2          | 0.2           |
|                          | gAHA/WT                                                      | 53.0                 | 18.6     | 10.2     | 5.5      | 3.8      | 7.3         | 1.1          | 0.2          | 0.2           |
|                          | WT/gAHA                                                      | 51.0                 | 19.3     | 11.6     | 5.8      | 3.6      | 7.1         | 1.1          | 0.4          | 0.2           |
|                          | TAP <sup>d</sup> /WT                                         | 48.8                 | 23.0     | 9.5      | 7.0      | 2.7      | 7.4         | 1.4          | 0.0          | 0.2           |
|                          | WT/TAP                                                       | 53.9                 | 20.4     | 10.0     | 4.9      | 3.1      | 6.2         | 1.3          | 0.0          | 0.2           |
| Soluble – 2 <sup>c</sup> | WT/WT – 1                                                    | 47.9                 | 21.2     | 11.3     | 5.4      | 4.4      | 7.6         | 1.6          | 0.4          | 0.1           |
|                          | WT/WT – 2                                                    | 50.1                 | 20.1     | 10.0     | 6.6      | 3.9      | 6.3         | 2.6          | 0.3          | 0.1           |
|                          | gAHA/WT                                                      | 51.5                 | 18.8     | 10.6     | 4.2      | 6.0      | 6.9         | 1.4          | 0.5          | 0.2           |
|                          | WT/gAHA                                                      | 51.4                 | 19.1     | 10.5     | 6.4      | 4.1      | 6.7         | 1.1          | 0.5          | 0.2           |
|                          | TAP/WT                                                       | 54.5                 | 18.7     | 9.3      | 5.1      | 4.2      | 6.9         | 0.8          | 0.3          | 0.2           |
|                          | WT/TAP                                                       | 54.6                 | 20.9     | 8.3      | 5.4      | 4.1      | 5.6         | 0.9          | 0.0          | 0.2           |
| PM <sup>f</sup> – 1      | WT/WT – 1                                                    | 52.0                 | 18.6     | 10.2     | 5.5      | 3.8      | 7.7         | 1.4          | 0.4          | 0.3           |
|                          | WT/WT – 2                                                    | 53.5                 | 18.4     | 10.0     | 5.4      | 3.7      | 6.8         | 1.5          | 0.3          | 0.3           |
|                          | gAHA/WT                                                      | 47.8                 | 20.7     | 10.2     | 6.2      | 5.1      | 7.8         | 1.3          | 0.6          | 0.2           |
|                          | WT/gAHA                                                      | 53.2                 | 18.7     | 9.2      | 6.2      | 4.0      | 6.0         | 1.2          | 0.7          | 0.1           |
|                          | TAP/WT                                                       | 57.1                 | 16.7     | 8.0      | 5.7      | 4.1      | 6.1         | 1.5          | 0.6          | 0.3           |
|                          | WT/TAP                                                       | 52.4                 | 18.5     | 8.9      | 7.1      | 3.3      | 7.8         | 1.2          | 0.4          | 0.4           |
| PM – 2                   | WT/WT – 1                                                    | 51.1                 | 19.0     | 9.6      | 4.6      | 4.0      | 8.7         | 1.6          | 0.4          | 0.7           |
|                          | WT/WT – 2                                                    | 49.9                 | 19.4     | 9.7      | 6.6      | 4.0      | 8.1         | 1.3          | 0.6          | 0.6           |
|                          | gAHA/WT                                                      | 49.8                 | 21.5     | 9.9      | 5.4      | 4.2      | 6.7         | 1.3          | 0.6          | 0.5           |
|                          | WT/gAHA                                                      | 55.1                 | 16.1     | 8.7      | 5.3      | 5.4      | 7.4         | 1.2          | 0.6          | 0.3           |

|        |      |      |      |     |     |     |     |     |     |
|--------|------|------|------|-----|-----|-----|-----|-----|-----|
| TAP/WT | 54.4 | 19.1 | 10.7 | 5.0 | 2.9 | 5.7 | 1.5 | 0.3 | 0.3 |
| WT/TAP | 50.1 | 20.1 | 10.8 | 6.7 | 3.7 | 6.0 | 1.8 | 0.5 | 0.3 |

---

<sup>a</sup>Number of peptides. <sup>b</sup>First biological replicate <sup>c</sup>Percent of total protein identifications  
<sup>d</sup>Ntapi:gAHA1a <sup>e</sup>Second biological replicate <sup>f</sup>Plasma membrane

---

**Supplemental Table S4:** All AHA peptide identifications in IgG purified, TEV eluted

<sup>14</sup>N Ntapi:gAHA1/<sup>15</sup>N wildtype and reciprocal pairs. Provided as separate file.

**Supplemental Table S5:** Average ratio of 14-3-3 general regulatory factor proteins identified in metabolically labeled, Ntapi:gAHA1 vs. wildtype co-purification experiments.

|                                  | <sup>14</sup> Ntapi:gAHA1a/ <sup>15</sup> NWT <sup>a</sup> |           |           |           | <sup>14</sup> NWT/ <sup>15</sup> Ntapi:gAHA1a <sup>b</sup> |           |          |
|----------------------------------|------------------------------------------------------------|-----------|-----------|-----------|------------------------------------------------------------|-----------|----------|
|                                  | Exp <sup>c</sup> 1                                         | Exp 2     | Exp 3     | Exp 4     | Exp 1                                                      | Exp 2     | Exp 3    |
| <b>GRF1</b><br><b>At4g09000</b>  | 1.15 (16) <sup>d</sup>                                     | 1.14 (11) | 1.26 (8)  | 1.11 (12) | 1.13 (9)                                                   | 1.13 (10) | 1.20 (6) |
| <b>GRF2</b><br><b>At1g78300</b>  | 0.99 (11)                                                  | 0.87 (7)  | 1.12 (7)  | 0.96 (6)  | 0.96 (2)                                                   | 0.88 (6)  | 0.83 (5) |
| <b>GRF3</b><br><b>At5g38480</b>  | 1.13 (19)                                                  | 1.18 (13) | 1.14 (14) | 1.02 (21) | 1.13 (8)                                                   | 1.12 (14) | 1.17 (9) |
| <b>GRF5</b><br><b>At5g16050</b>  | 1.03 (3)                                                   | 1.11 (1)  | 1.36 (1)  | 1.10 (2)  | 0.77 (2)                                                   | 0.73 (1)  | --       |
| <b>GRF6</b><br><b>At5g10450</b>  | 0.98 (6)                                                   | 0.95 (2)  | 1.00 (3)  | 0.99 (4)  | 0.91 (5)                                                   | 0.67 (3)  | --       |
| <b>GRF7</b><br><b>At3g02520</b>  | 1.01 (2)                                                   | 0.67 (1)  | --        | --        | 1.06 (2)                                                   | 0.89 (2)  | 0.76 (1) |
| <b>GRF8</b><br><b>At5g65430</b>  | 0.86 (9)                                                   | 0.82 (5)  | 0.93 (8)  | 0.88 (3)  | 0.74 (7)                                                   | 0.74 (4)  | --       |
| <b>GRF9</b><br><b>At2g42590</b>  | 1.02 (11)                                                  | 0.93 (3)  | 1.15 (7)  | 1.11 (8)  | 1.03 (11)                                                  | 1.06 (9)  | 1.08 (4) |
| <b>GRF10</b><br><b>At1g22300</b> | 0.96 (16)                                                  | 1.02 (10) | 0.97 (11) | 0.91 (11) | 0.99 (10)                                                  | 0.90 (13) | 1.03 (4) |

<sup>a</sup> <sup>14</sup>N Ntapi:gAHA1a/<sup>15</sup>N wildtype; <sup>b</sup> <sup>14</sup>N wildtype/<sup>15</sup>N Ntapi:gAHA1a; <sup>c</sup> Biological replicates; <sup>d</sup> number of peptides used to calculate average ratio
